# Supplementary material for: Changes in metabolic parameters in psoriatic patients treated with secukinumab
Source: PubMed Central journal article supplement — Ther Adv Chronic Dis. 2020 Aug 3;11:2040622320944777. doi: 10.1177/2040622320944777 (PMC7412909; doi:10.1177/2040622320944777), 2020-08-03
Supplement: TableS1_0614.pdf [file TableS1_0614.pdf]

Table S1. Changes of metabolic parameters at week 0 and week 12 after interleukin-17A blockade (secukinumab/ Cosentyx®) and stratified analysis by PASI-90 response at week 12

|                    | All (n=99) |       | PASI-90+ at week12<br>(n=46) |      | PASI-90- at week12<br>(n=53) |       |
|--------------------|------------|-------|------------------------------|------|------------------------------|-------|
|                    | W0         | W12   | W0                           | W12  | W0                           | W12   |
| HsCRP <sup>+</sup> | 3.7        | 2.2** | 3.4                          | 1.8* | 4.0                          | 2.8*  |
| ESR <sup>+</sup>   | 9          | 7     | 8                            | 7    | 9                            | 8     |
| Sugar              | 98         | 103*  | 96                           | 97   | 101                          | 109*  |
| UA                 | 6.6        | 6.3*  | 6.5                          | 6.3  | 6.7                          | 6.3*  |
| HDL                | 44         | 44    | 44                           | 45   | 44                           | 43    |
| LDL                | 114        | 115   | 115                          | 111  | 112                          | 117   |
| CHOL               | 185        | 188   | 184                          | 186  | 185                          | 191   |
| TG                 | 134        | 152*  | 129                          | 141  | 139                          | 161*  |
| n-HDL              | 141        | 145   | 141                          | 141  | 141                          | 148   |
| AIP                | 0.45       | 0.50* | 0.42                         | 0.45 | 0.47                         | 0.54* |

Mean, +Median. BW, Body weight; BMI, body mass index; Chol, cholesterol; ESR, erythrocyte sedimentation rate; HDL, high-density lipoprotein; hs-CRP, high-sensitivity C-reactive protein; LDL, low-density lipoprotein; n-HDL, non high-density lipoprotein; PASI, Psoriasis Area and Severity Index; TG, triglyceride. AIP, Atherogenic index of plasma (AIP = Log(TG/HDL\_C). The paired t-test was used to analyze metabolic parameters between week 0 and week 12. Wilcoxon signed rank test was used to analyze the ESR and hs-CRP (1) between week 0 and week 12. \*: p value was less than 0.05; \*\*: p value was less than 0.001.
